# Supplementary material for: Founder Effects in Hereditary Hemorrhagic Telangiectasia
Source: MDPI journal article supplement (doi:10.3390/jcm10081682), 2021-04-14
Supplement: s1 [file s1]

**Table S2.** Reassessment of pathogenicity of variants reported as “pending” in the *ENG* and *ACVRL1* Databases [26,27]

| Variant                                      | In silico predilection                  |                                         |                    |                                              | HGMD Accession Number | Authors' report [Ref. No.]                                                                                                                                                                                           | Patogenicity (ACMG) |
|----------------------------------------------|-----------------------------------------|-----------------------------------------|--------------------|----------------------------------------------|-----------------------|----------------------------------------------------------------------------------------------------------------------------------------------------------------------------------------------------------------------|---------------------|
|                                              | PolyPhen2                               |                                         | MutPred2*          | SIFT**                                       |                       |                                                                                                                                                                                                                      |                     |
|                                              | HumDiv*                                 | HumVar*                                 |                    |                                              |                       |                                                                                                                                                                                                                      |                     |
| ACVRL1 c.289-294delCACAAC (p.His97_Asn98del) |                                         |                                         |                    |                                              | CD023489              | Absent in healthy controls (n=50), deletes two highly conserved amino acids of the extracellular domain, compared to ortologs [33]                                                                                   | Likely pathogenic   |
| ACVRL1 c.1280A>T (p.Asp427Val)               | probably damaging with a score of 1.000 | probably damaging with a score of 0.999 | pathogenic (0.820) | AFFECT PROTEIN FUNCTION with a score of 0.00 | CM060792              | Absent in healthy controls (n=100), cosegregated with disease in families, affecting conserved amino acids among ortologs [38]. Absent in healthy controls (n=20) [25]                                               | Pathogenic          |
| ENG c.781T>C (p. Trp261Arg)                  | probably damaging with a score of 0.999 | probably damaging with a score of 0.997 | pathogenic (0.863) | AFFECT PROTEIN FUNCTION with a score of 0.00 | CM050044              | “Deleterious” [52]                                                                                                                                                                                                   | Pathogenic          |
| ENG c.1238G>T (p. Gly413Val)                 | probably damaging with a score of 1.000 | probably damaging with a score of 1.000 | pathogenic (0.763) | AFFECT PROTEIN FUNCTION with a score of 0.00 | CM001137              | Absent in healthy controls (104 North American or northern European whites, 42 Antilleans, 67 Dutch samples), cosegregated with disease in the Antillean and Dutch families exhibiting a shared core haplotype; [23] | Pathogenic          |
| ENG c.1311G>A (p. Arg437Arg)                 | -                                       | -                                       | -                  | TOLERATED with a score of 1.00               | -                     | Silent mutation occurring at the last position of exon9b . This position is part of the consensus sequence of the donor splice site and is highly conserved [52]                                                     | VUS                 |
| ENG c.1686+5G>C                              |                                         |                                         |                    |                                              | CS085778              | Absent in healthy controls (n=100), cosegregated with disease in families [60]                                                                                                                                       | Likely pathogenic   |

Abbreviations and legends: \* > 0.5 likely pathogenic; \*\* < 0.05 pathogenic; The synonym mutation (p.Arg437Arg) is interpreted by the SIFT only; VUS: variant of uncertain significance; HGMD: Human Gene Mutation Database; Ref No.: reference number in the text; ACMG: Americal College of Medical Genetics and Genomics
