# Supplementary material for: Founder Effects in Hereditary Hemorrhagic Telangiectasia
Source: MDPI journal article supplement (doi:10.3390/jcm10081682), 2021-04-14
Supplement: s1 [file s1]

**Figure S1.** Haplotype analysis of patients and unaffected individuals in 7 families with the *ACVRL1* c.625+1G>C mutation [46].

|                | Fam. 1                                                                            |                                                                                   | Family 2                                                                          |                                                                                   |                                                                                   |                                                                                   |                                                                                   |                                                                                   |                                                                                    |                                                                                     |                                                                                     |                                                                                     | Family 3                                                                            |                                                                                     |                                                                                     |  |  |  |
|----------------|-----------------------------------------------------------------------------------|-----------------------------------------------------------------------------------|-----------------------------------------------------------------------------------|-----------------------------------------------------------------------------------|-----------------------------------------------------------------------------------|-----------------------------------------------------------------------------------|-----------------------------------------------------------------------------------|-----------------------------------------------------------------------------------|------------------------------------------------------------------------------------|-------------------------------------------------------------------------------------|-------------------------------------------------------------------------------------|-------------------------------------------------------------------------------------|-------------------------------------------------------------------------------------|-------------------------------------------------------------------------------------|-------------------------------------------------------------------------------------|--|--|--|
|                |  |  |  |  |  |  |  |  |  |  |  |  |  |  |  |  |  |  |
|                | 79                                                                                | 82 <sup>+</sup>                                                                   | 62                                                                                | 61                                                                                | 60*                                                                               | 59                                                                                | 36                                                                                | 34                                                                                | 33*                                                                                | 5                                                                                   | 1                                                                                   | 38*                                                                                 | 37                                                                                  | 12                                                                                  | 9                                                                                   |  |  |  |
| D12S85         | 19                                                                                | 12                                                                                | 19                                                                                | 18                                                                                | 12                                                                                | 12                                                                                | 12                                                                                | 18                                                                                | 12                                                                                 | 12                                                                                  | 12                                                                                  | 12                                                                                  | 12                                                                                  | 12                                                                                  | 12                                                                                  |  |  |  |
| D12S2196       | 9                                                                                 | 10                                                                                | 10                                                                                | 12                                                                                | 7                                                                                 | 10                                                                                | 10                                                                                | 10                                                                                | 10                                                                                 | 10                                                                                  | 10                                                                                  | 4                                                                                   | 10                                                                                  | 12                                                                                  | 10                                                                                  |  |  |  |
| rs2071219      | A                                                                                 | G                                                                                 | A                                                                                 | G                                                                                 | G                                                                                 | G                                                                                 | A                                                                                 | G                                                                                 | G                                                                                  | G                                                                                   | A                                                                                   | A                                                                                   | A                                                                                   | A                                                                                   | G                                                                                   |  |  |  |
| <u>c.625+1</u> | <u>G</u>                                                                          | <u>C</u>                                                                          | <u>G</u>                                                                          | <u>C</u>                                                                          | <u>G</u>                                                                          | <u>G</u>                                                                          | <u>G</u>                                                                          | <u>G</u>                                                                          | <u>G</u>                                                                           | <u>C</u>                                                                            | <u>G</u>                                                                            | <u>G</u>                                                                            | <u>G</u>                                                                            | <u>C</u>                                                                            | <u>C</u>                                                                            |  |  |  |
| rs706815       | T                                                                                 | T                                                                                 | C                                                                                 | T                                                                                 | T                                                                                 | T                                                                                 | T                                                                                 | T                                                                                 | T                                                                                  | T                                                                                   | T                                                                                   | T                                                                                   | T                                                                                   | T                                                                                   | T                                                                                   |  |  |  |
| rs706816       | A                                                                                 | A                                                                                 | G                                                                                 | A                                                                                 | G                                                                                 | A                                                                                 | A                                                                                 | A                                                                                 | A                                                                                  | A                                                                                   | A                                                                                   | A                                                                                   | A                                                                                   | A                                                                                   | A                                                                                   |  |  |  |
| D12S1677       | 20                                                                                | 20                                                                                | 21                                                                                | 20                                                                                | 21                                                                                | 20                                                                                | 21                                                                                | 20                                                                                | 20                                                                                 | 20                                                                                  | 20                                                                                  | 19                                                                                  | 20                                                                                  | 21                                                                                  | 20                                                                                  |  |  |  |
| D12S1712       | 17                                                                                | 16                                                                                | 13                                                                                | 16                                                                                | 13                                                                                | 13                                                                                | 17                                                                                | 13                                                                                | 25                                                                                 | 16                                                                                  | 16                                                                                  | 16                                                                                  | 16                                                                                  | 25                                                                                  | 16                                                                                  |  |  |  |
| D12S270        | 19                                                                                | 21                                                                                | 19                                                                                | 11                                                                                | 11                                                                                | 19                                                                                | 11                                                                                | 11                                                                                | 11                                                                                 | 21                                                                                  | 11                                                                                  | 21                                                                                  | 19                                                                                  | 21                                                                                  | 19                                                                                  |  |  |  |

|                | Family 4                                                                          |                                                                                   |                                                                                   |                                                                                   |                                                                                   | Family 5                                                                          |                                                                                   |                                                                                   |                                                                                    |                                                                                     | Family 6                                                                            |                                                                                     |                                                                                     |                                                                                     |                                                                                     | Family 7                                                                            |                                                                                     |                                                                                     |
|----------------|-----------------------------------------------------------------------------------|-----------------------------------------------------------------------------------|-----------------------------------------------------------------------------------|-----------------------------------------------------------------------------------|-----------------------------------------------------------------------------------|-----------------------------------------------------------------------------------|-----------------------------------------------------------------------------------|-----------------------------------------------------------------------------------|------------------------------------------------------------------------------------|-------------------------------------------------------------------------------------|-------------------------------------------------------------------------------------|-------------------------------------------------------------------------------------|-------------------------------------------------------------------------------------|-------------------------------------------------------------------------------------|-------------------------------------------------------------------------------------|-------------------------------------------------------------------------------------|-------------------------------------------------------------------------------------|-------------------------------------------------------------------------------------|
|                |  |  |  |  |  |  |  |  |  |  |  |  |  |  |  |  |  |  |
|                | 58                                                                                | 56                                                                                | 54*                                                                               | 37                                                                                | 33                                                                                | 67                                                                                | 66                                                                                | 64                                                                                | 56                                                                                 | 53*                                                                                 | 33                                                                                  | 30                                                                                  | 1                                                                                   | 67                                                                                  | 61                                                                                  | 38                                                                                  | 68                                                                                  | 65                                                                                  |
| D12S85         | 12                                                                                | 12                                                                                | 20                                                                                | 12                                                                                | 20                                                                                | 12                                                                                | 12                                                                                | 12                                                                                | 18                                                                                 | 12                                                                                  | 18*                                                                                 | 12                                                                                  | 18                                                                                  | 12                                                                                  | 12                                                                                  | 12                                                                                  | 20                                                                                  | 12                                                                                  |
| D12S2196       | 10                                                                                | 11                                                                                | 11                                                                                | 10                                                                                | 11                                                                                | 10                                                                                | 10                                                                                | 7                                                                                 | 7                                                                                  | 10                                                                                  | 7*                                                                                  | 10                                                                                  | 7                                                                                   | 10                                                                                  | 7                                                                                   | 10                                                                                  | 10                                                                                  | 10                                                                                  |
| rs2071219      | A                                                                                 | A                                                                                 | A                                                                                 | G                                                                                 | A                                                                                 | G                                                                                 | A                                                                                 | G                                                                                 | G                                                                                  | G                                                                                   | G                                                                                   | G                                                                                   | G                                                                                   | A                                                                                   | G                                                                                   | G                                                                                   | G                                                                                   | G                                                                                   |
| <u>c.625+1</u> | <u>G</u>                                                                          | <u>G</u>                                                                          | <u>G</u>                                                                          | <u>C</u>                                                                          | <u>G</u>                                                                          | <u>C</u>                                                                          | <u>G</u>                                                                          | <u>G</u>                                                                          | <u>G</u>                                                                           | <u>C</u>                                                                            | <u>G</u>                                                                            | <u>G</u>                                                                            | <u>G</u>                                                                            | <u>G</u>                                                                            | <u>C</u>                                                                            | <u>G</u>                                                                            | <u>C</u>                                                                            | <u>C</u>                                                                            |
| rs706815       | T                                                                                 | C                                                                                 | C                                                                                 | T                                                                                 | C                                                                                 | T                                                                                 | C                                                                                 | T                                                                                 | T                                                                                  | T                                                                                   | T                                                                                   | T                                                                                   | T                                                                                   | T                                                                                   | T                                                                                   | T                                                                                   | T                                                                                   | T                                                                                   |
| rs706816       | A                                                                                 | G                                                                                 | G                                                                                 | A                                                                                 | G                                                                                 | A                                                                                 | G                                                                                 | A                                                                                 | A                                                                                  | A                                                                                   | A                                                                                   | A                                                                                   | A                                                                                   | A                                                                                   | A                                                                                   | A                                                                                   | A                                                                                   | A                                                                                   |
| D12S1677       | 20                                                                                | 21                                                                                | 21                                                                                | 20                                                                                | 21                                                                                | 20                                                                                | 22                                                                                | 20                                                                                | 20                                                                                 | 18                                                                                  | 20                                                                                  | 20                                                                                  | 18                                                                                  | 20                                                                                  | 19                                                                                  | 20                                                                                  | 20                                                                                  | 20                                                                                  |
| D12S1712       | 16                                                                                | 17                                                                                | 18                                                                                | 16                                                                                | 16                                                                                | 16                                                                                | 17                                                                                | 16                                                                                | 24                                                                                 | 16                                                                                  | 16                                                                                  | 16                                                                                  | 24                                                                                  | 16                                                                                  | 17                                                                                  | 16                                                                                  | 17                                                                                  | 16                                                                                  |
| D12S270        | 11                                                                                | 11                                                                                | 21                                                                                | 21                                                                                | 11                                                                                | 21                                                                                | 11                                                                                | 11                                                                                | 11                                                                                 | 21                                                                                  | 9                                                                                   | 11                                                                                  | 9                                                                                   | 21                                                                                  | 9                                                                                   | 9                                                                                   | 11                                                                                  | 11                                                                                  |

Legends: blackened individuals are heterozygous, individual age at haplotype analysis is indicated; <sup>+</sup>: patient died in the year of haplotype analysis; \*: non-consanguineous spouses; \*: haplotype modification probably caused by recombination; intragenic polymorphic markers are highlighted with bold characters and the mutation site is additionally underscored; chromosomal location of the STR sequences: D12S85 (AC)<sub>n</sub>: 12q13.11 (47,336,687-47,336,862); D12S2196 (CTAT)<sub>n</sub>: 12q13.11 (48,700,248-48,700,547); D12S1677 (GT)<sub>n</sub>: 12q13.13 (53,312,927-53,313,286); D12S1712 (GT)<sub>n</sub>: 12q13.13 (52,445,897-52,446,222); D12S270 (CA)<sub>n</sub>: 12q13.13 (52,709,971-52,710,294). Chromosomal location of the *ACVRL1* intragenic SNPs: rs2071219 (c.314-35A>G, MAF 0.437), rs706815 (c.1377+45T>C, MAF 0.343) and rs706816 (c.1377+65A>G, MAF 0.343); in the case of a 65-year-old female in Family 7 haplotype analysis was incomplete.
