# Supplementary material for: Founder Effects in Hereditary Hemorrhagic Telangiectasia
Source: J Clin Med. 2021 Apr 14;10(8):1682. doi: 10.3390/jcm10081682 (PMC8070971; doi:10.3390/jcm10081682)
Supplement: Supplementary file 1 [file jcm-10-01682-s001.zip]

Archive with 4 entries (4 files):
- Figure S1_Major et al.pdf
- Figure S2_Major et al.pdf
- Table S1_Major et al.pdf
- Table S2_Major et al.pdf
